# Supplementary material for: Older Adult Patients in the Emergency Department: Which Patients should be Selected for a Different Approach?
Source: PubMed Central journal article supplement — Ann Geriatr Med Res. 2023 Nov 15;28(1):9–19. doi: 10.4235/agmr.23.0121 (PMC10982447; doi:10.4235/agmr.23.0121), 2023-11-15
Supplement: agmr-23-0121-Table-S2.pdf [file agmr-23-0121-Table-S2.pdf]

**Table S2.** Univariate analysis for poor outcomes in people over 65 years of age for 30-day mortality, readmission, and re-presentation using univariate survival models

|                                      | 30-day mortality     |         | 30-day readmission  |         | 30-day re-presentation |         | 30-day poor outcome |         |
|--------------------------------------|----------------------|---------|---------------------|---------|------------------------|---------|---------------------|---------|
|                                      | HR (95% CI)          | p-value | HR (95% CI)         | p-value | HR (95% CI)            | p-value | HR (95% CI)         | p-value |
| Sex, male                            | 1.261 (1.118–1.423)  | 0.0002  | 1.398 (1.271–1.538) | <0.0001 | 1.204 (1.136–1.277)    | <0.0001 | 1.214 (1.152–1.280) | <0.0001 |
| Age (y)                              |                      |         |                     |         |                        |         |                     |         |
| 65–74                                | Ref                  | Ref     | Ref                 | Ref     | Ref                    | Ref     | Ref                 | Ref     |
| 75–84                                | 1.829 (1.530–2.185)  | <0.0001 | 1.276 (1.137–1.433) | <0.0001 | 1.088 (1.018–1.164)    | 0.0132  | 1.151 (1.082–1.225) | <0.0001 |
| ≥85                                  | 4.510 (3.822–5.321)  | <0.0001 | 1.784 (1.584–2.009) | <0.0001 | 1.160 (1.077–1.249)    | <0.0001 | 1.436 (1.345–1.533) | <0.0001 |
| Social situation                     |                      |         |                     |         |                        |         |                     |         |
| Lives alone                          | Ref                  | Ref     | Ref                 | Ref     | Ref                    | Ref     | Ref                 | Ref     |
| Lives in company                     | 1.498 (1.151–1.950)  | 0.0027  | 1.160 (0.961–1.400) | 0.1223  | 1.050 (0.936–1.178)    | 0.4076  | 1.127 (1.015–1.253) | 0.0258  |
| Lives in residence                   | 4.329 (3.257–5.754)  | <0.0001 | 1.674 (1.321–2.120) | 0.0004  | 1.132 (0.967–1.325)    | 0.1231  | 1.565 (1.368–1.789) | <0.0001 |
| Unknown                              | 0.643 (0.484–0.853)  | 0.0023  | 0.792 (0.651–0.963) | 0.0194  | 0.958 (0.853–1.077)    | 0.4749  | 0.924 (0.830–1.029) | 0.1519  |
| Social assistance                    |                      |         |                     |         |                        |         |                     |         |
| Yes                                  | Ref                  | Ref     | Ref                 | Ref     | Ref                    | Ref     | Ref                 | Ref     |
| No                                   | 0.422 (0.340–0.524)  | <0.0001 | 0.613 (0.507–0.740) | <0.0001 | 0.865 (0.760–0.986)    | 0.0293  | 0.746 (0.668–0.834) | <0.0001 |
| Unknown                              | 0.482 (0.397–0.584)  | <0.0001 | 0.664 (0.557–0.790) | <0.0001 | 0.934 (0.826–1.056)    | 0.2739  | 0.806 (0.727–0.895) | <0.0001 |
| Arrival (ambulance)                  | 5.792 (5.106–6.569)  | <0.0001 | 1.711 (1.551–1.888) | <0.0001 | 1.064 (0.996–1.137)    | 0.0642  | 1.482 (1.402–1.566) | <0.0001 |
| Charlson Index                       | 1.227 (1.211–1.243)  | <0.0001 | 1.178 (1.162–1.194) | <0.0001 | 1.097 (1.085–1.109)    | <0.0001 | 1.130 (1.120–1.140) | <0.0001 |
| 0                                    | Ref                  | Ref     | Ref                 | Ref     | Ref                    | Ref     | Ref                 | Ref     |
| 1–2                                  | 2.748 (2.157–3.501)  | <0.0001 | 1.953 (1.668–2.287) | <0.0001 | 1.301 (1.202–1.408)    | <0.0001 | 1.389 (1.290–1.496) | <0.0001 |
| 3–4                                  | 4.273 (3.326–5.490)  | <0.0001 | 3.206 (2.720–3.779) | <0.0001 | 1.651 (1.512–1.804)    | <0.0001 | 1.860 (1.714–2.018) | <0.0001 |
| ≥5                                   | 9.899 (7.799–12.565) | <0.0001 | 4.872 (4.135–5.739) | <0.0001 | 2.042 (1.861–2.240)    | <0.0001 | 2.635 (2.426–2.863) | <0.0001 |
| Charlson Index (≥3)                  | 3.201 (2.833–3.617)  | <0.0001 | 2.462 (2.240–2.705) | <0.0001 | 1.532 (1.445–1.624)    | <0.0001 | 1.760 (1.670–1.854) | <0.0001 |
| Barthel index                        |                      |         |                     |         |                        |         |                     |         |
| Independent                          | Ref                  | Ref     | Ref                 | Ref     | Ref                    | Ref     | Ref                 | Ref     |
| Mild-moderate dependence             | 3.735 (3.225–4.326)  | <0.0001 | 1.906 (1.716–2.117) | <0.0001 | 1.335 (1.250–1.426)    | <0.0001 | 1.548 (1.459–1.642) | <0.0001 |
| Severe dependence                    | 8.234 (7.078–9.579)  | <0.0001 | 2.305 (2.009–2.645) | <0.0001 | 1.309 (1.188–1.442)    | <0.0001 | 1.944 (1.799–2.101) | <0.0001 |
| Dementia (yes)                       | 3.159 (2.750–3.606)  | <0.0001 | 1.374 (1.195–1.581) | <0.0001 | 1.151 (1.050–1.262)    | 0.0026  | 1.418 (1.314–1.530) | <0.0001 |
| Delirium (yes)                       | 3.035 (2.417–3.877)  | <0.0001 | 1.483 (1.153–1.907) | 0.0021  | 1.132 (0.951–1.347)    | 0.1620  | 1.390 (1.205–1.602) | <0.0001 |
| Falls in the previous 6 months (yes) | 1.369 (1.115–1.682)  | 0.0027  | 0.974 (0.807–1.174) | 0.7804  | 1.097 (0.983–1.224)    | 0.0971  | 1.129 (1.025–1.245) | 0.0144  |

The 30-day poor outcome is a composite variable including 30-day mortality, readmission, and re-presentation.

HR, hazard ratio; CI, confidence interval.
